# Supplementary material
Source: MDPI journal article supplement (https://www.mdpi.com/2076-3271/11/2/41)
Supplement: s1 [file s1]

Supplementary Materials

# Prognostic Value of HIF-1 $\alpha$ -Induced Genes in Sepsis/Septic Shock

Nikolaos S. Lotsios, Chrysi Keskinidou, Edison Jahaj, Zafeiria Mastora, Ioanna Dimopoulou, Stylianos E. Orfanos, Niki Vassilaki, Alice G. Vassiliou and Anastasia Kotanidou

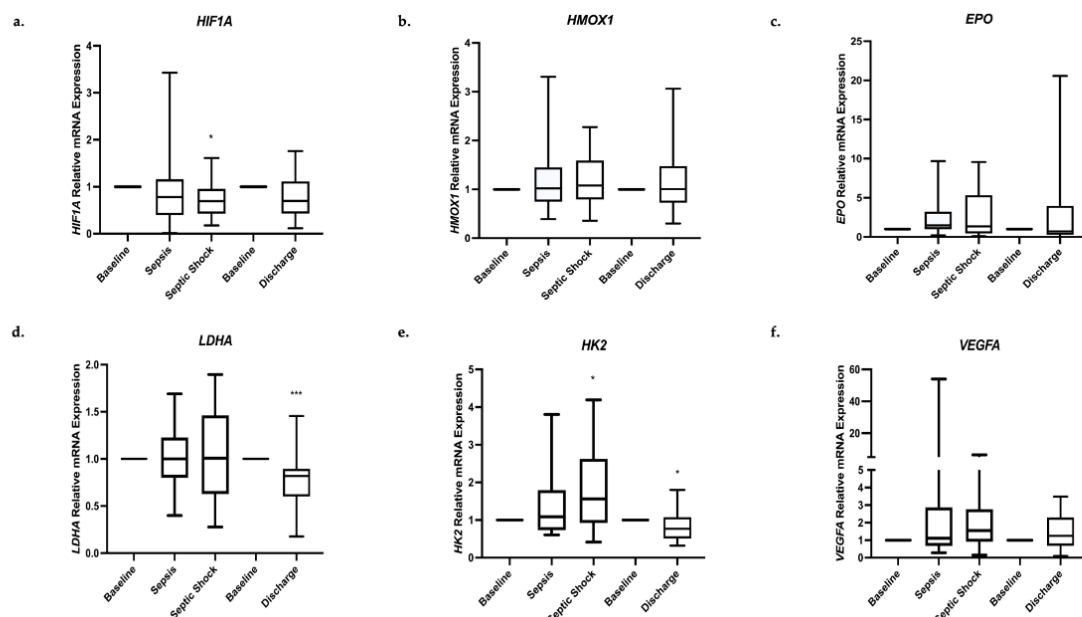

**Figure S1:** Relative mRNA expression of *HIF1A* (a), *HMOX1* (b), *EPO* (c), *LDHA* (d), *HK2* (e) and *VEGFA* (f) in whole blood samples, on ICU admission, sepsis and septic shock (septic patients), and on ICU admission and discharge (non-septic patients). The non-parametric Mann-Whitney test or the Kruskal-Wallis non-parametric one way ANOVA followed by Dunn's post-hoc test were performed, accordingly. Data are presented as box plots. Line in the box, median value; box edges, 25th to 75th centiles; whiskers, range of values; \* $p < 0.05$ ; \*\*\* $p < 0.001$  versus baseline.
